# Supplementary material
Source: PubMed Central journal article supplement (PMC3490511)

## **Supplemental Data**

### **Fragile X Premutation RNA is Sufficient to Cause Primary Ovarian**

### **Insufficiency in Mice**

Cuiling Lu<sup>1</sup>, Li Lin<sup>2</sup>, Huiping Tan<sup>2</sup>, Hao Wu<sup>3</sup>, Stephanie L. Sherman<sup>2</sup>, Fei Gao<sup>1</sup>, Peng  
Jin<sup>2\*</sup>, Dahua Chen<sup>1\*</sup>

## Supplemental Figure Legends

### **Figure 1. Expression of *FM R1* gene in the ovaries of fragile X premutation mice.**

Ovaries were isolated from fragile X premutation transgenic mice (TG296) and their WT littermates. **A.** Real-time PCR assay reveals *Fmr1* mRNA levels versus WT littermates. **B.** Western blots for FMRP in fragile X premutation and WT littermates with GAPDH as internal control. Representative images are shown.

### **Figure 2. Gonadotropin-induced response of follicular cells in fragile X premutation**

**mice. A.** Shown are the numbers of the oocytes ovulated after injection of exogenous hormones (PMSG and hCG) in WT and fragile X premutation females. Data represent the average number of oocytes collected from superovulated WT and fragile X premutation mice (n = 7). **B.** Size of ovulated oocytes.

**A**

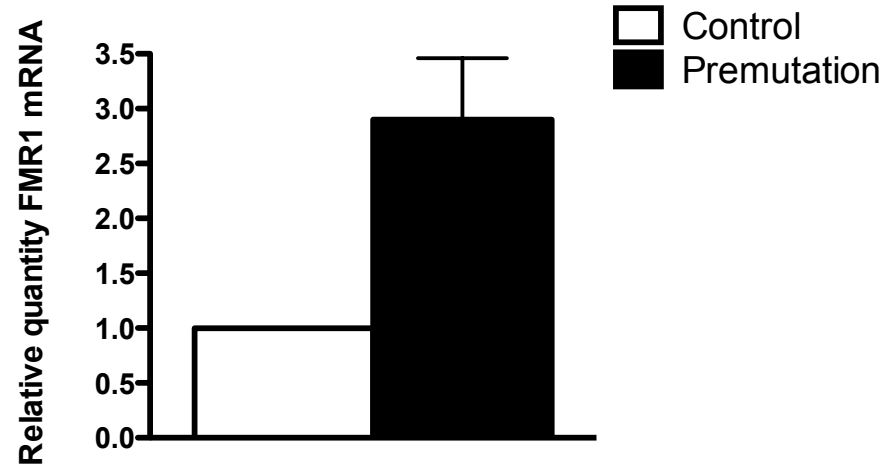

**B**

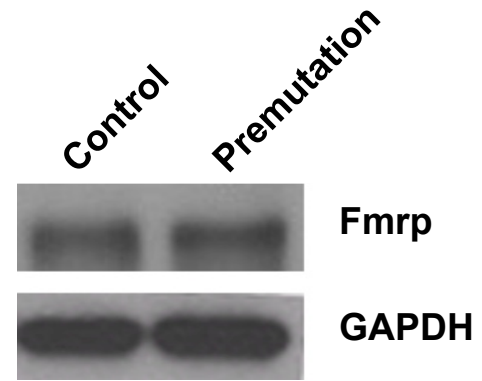

Supplemental Figure 2-Lu et al.

**A**

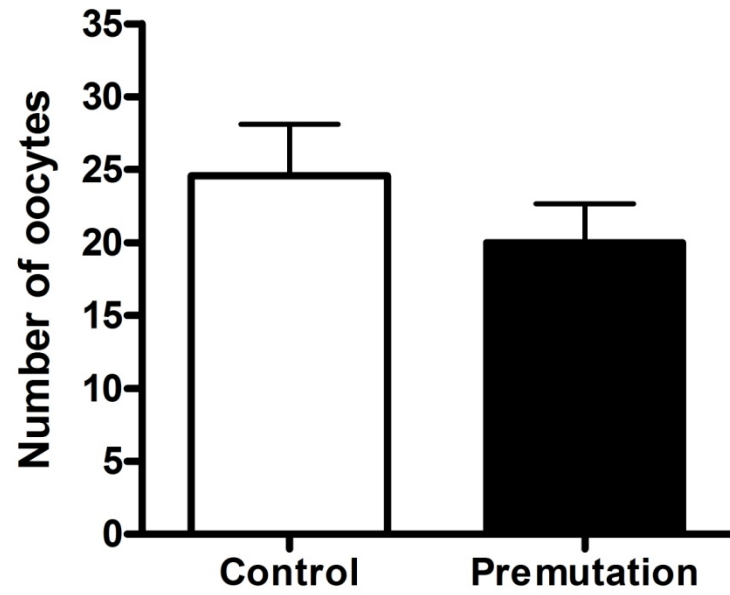

**B**

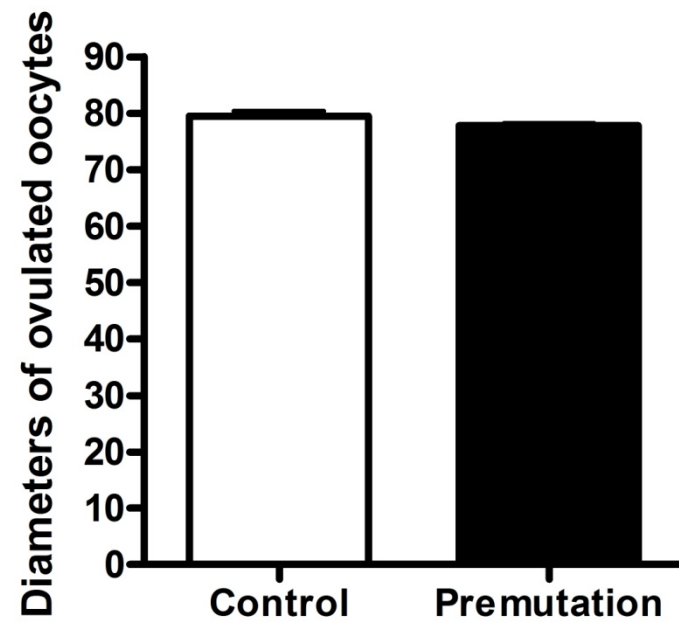

Supplement: supp_dds348_dds348supp.pdf [file supp_dds348_dds348supp.pdf]
